# Supplementary material for: In situ growth of N-doped carbon nanotubes from the products of graphitic carbon nitride etching by nickel nanoparticles
Source: Royal Society of Chemistry journal article supplement (doi:10.1039/d3na00983a), 2024-01-01
Supplement: d3na00983a1.pdf [file d3na00983a1.pdf]

**Note added after first publication:** This ESI replaces the version published on 26-Feb-2024 which contained errors in the magnification of the SEM images in Figure S4

## Supporting Information

### **In-situ Growth of N-Doped Carbon Nanotubes from the Products of Graphitic Carbon Nitride Etching by Nickel Nanoparticles**

Mariusz Pietrowski,<sup>\*a</sup> Emilia Alwin,<sup>a</sup> Michał Zieliński,<sup>a</sup> Sabine Szunerits,<sup>b</sup> Agata Suchora<sup>a</sup> and

Robert Wojcieszak<sup>\*c</sup>

a. Adam Mickiewicz University, Poznań, Faculty of Chemistry, Uniwersytetu  
Poznańskiego 8, 61-614 Poznań, Poland.

b. Univ. Lille, CNRS, Centrale Lille Univ. Polytechnique Hauts-de-France,  
UMR 8520 - IEMN, F-59000 Lille, France

c. Univ. Lille, CNRS, Centrale Lille, Univ. Artois UMR 8181 - UCCS - Unité de  
Catalyse et Chimie du Solide, F-59000 Lille, Fr

#### **Corresponding Author**

\*Robert Wojcieszak, e-mail: [Robert.wojcieszak@univ-lille.fr](mailto:Robert.wojcieszak@univ-lille.fr)

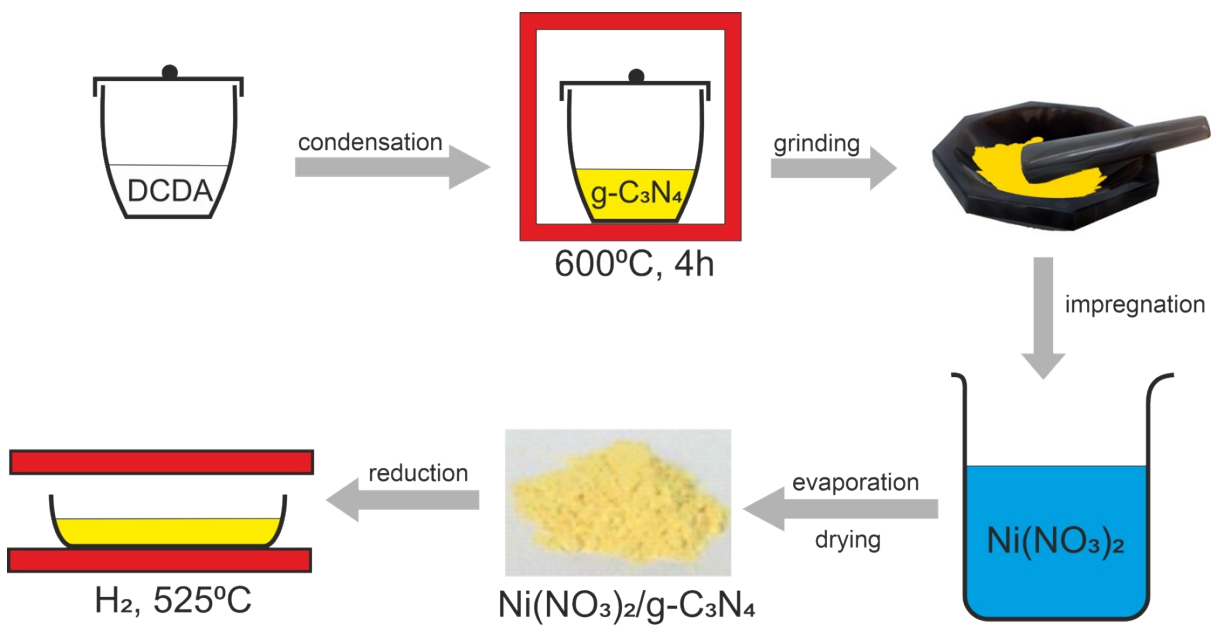

**Figure S1.** Scheme of catalysts preparation.

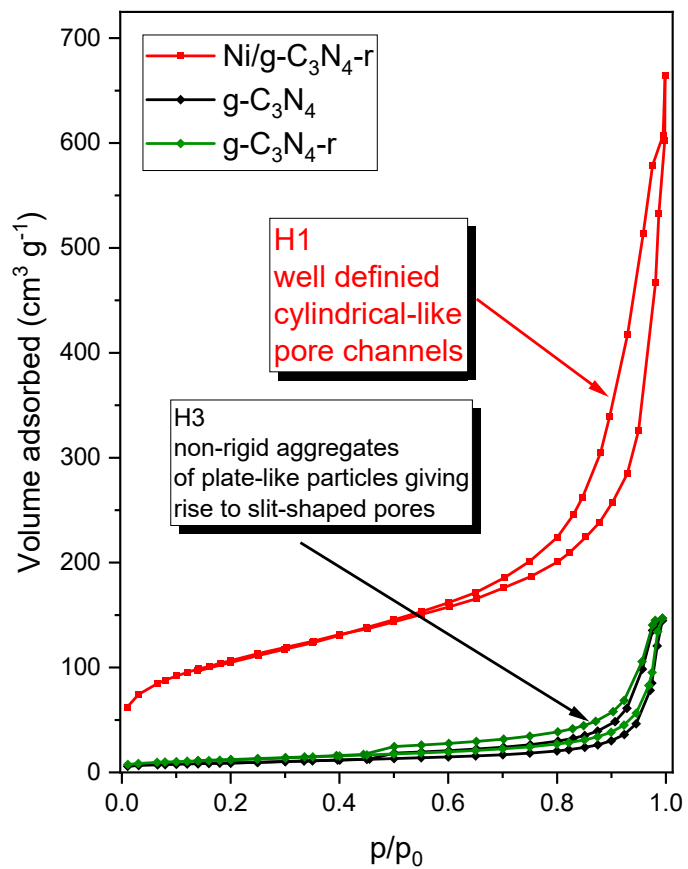

**Figure S2.** Low-temperature nitrogen adsorption/desorption isotherms of Ni/g-C<sub>3</sub>N<sub>4</sub>-r catalyst and pristine g-C<sub>3</sub>N<sub>4</sub> and reduced g-C<sub>3</sub>N<sub>4</sub>.

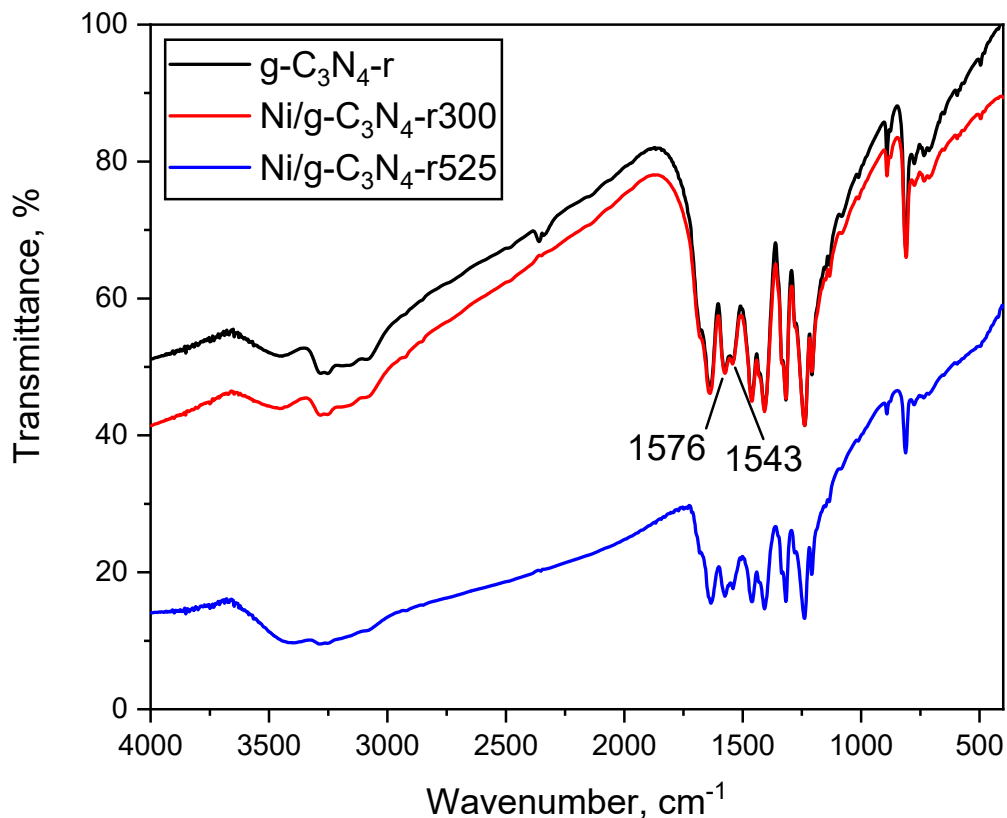

**Figure S3.** FTIR spectra of reduced graphitic carbon nitride (g-C<sub>3</sub>N<sub>4</sub>-r), and Ni/g-C<sub>3</sub>N<sub>4</sub> sample reduced at 300 and 525 °C.

FTIR spectra of g-C<sub>3</sub>N<sub>4</sub>-r indicate a structure typical of graphitic carbon nitride. Bands in the 1100-1700 cm<sup>-1</sup> range corresponding to characteristic stretching modes of the C-N ring of heterocycles were observed. The number and shape of the bands suggest the presence of tri-s-triazine (heptazine) subunits, as also indicated by the doublet at 1576 cm<sup>-1</sup> and 1543 cm<sup>-1</sup> [1]. A significant reduction in the intensity of FTIR bands in the 1100-1700 cm<sup>-1</sup> range indicates partial degradation of the g-C<sub>3</sub>N<sub>4</sub> structure after reduction of the Ni/g-C<sub>3</sub>N<sub>4</sub> sample.

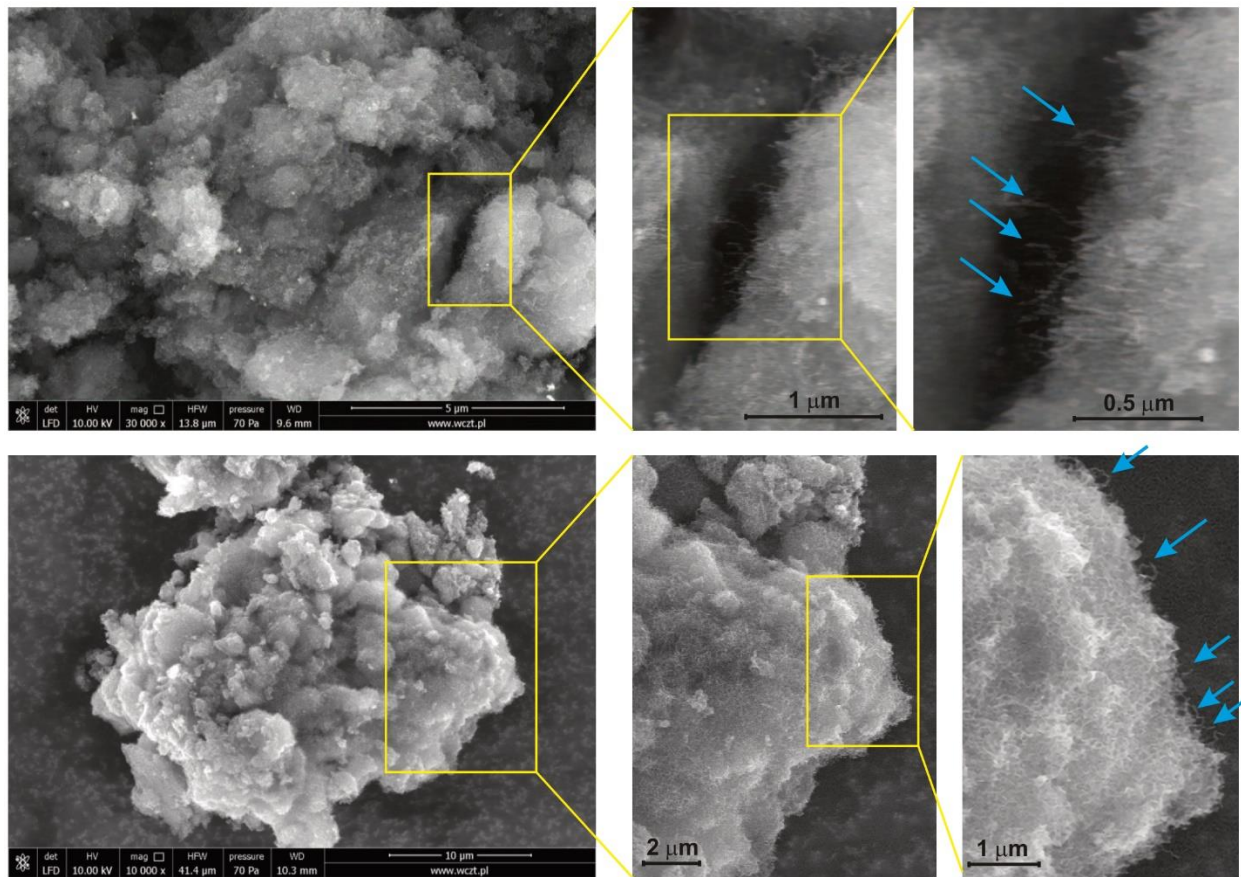

**Figure S4.** SEM images of Ni/g-C<sub>3</sub>N<sub>4</sub>-r sample (after reduction in hydrogen at 525 °C) and digital magnifications of selected areas. The fibrous structures are marked with blue arrows.

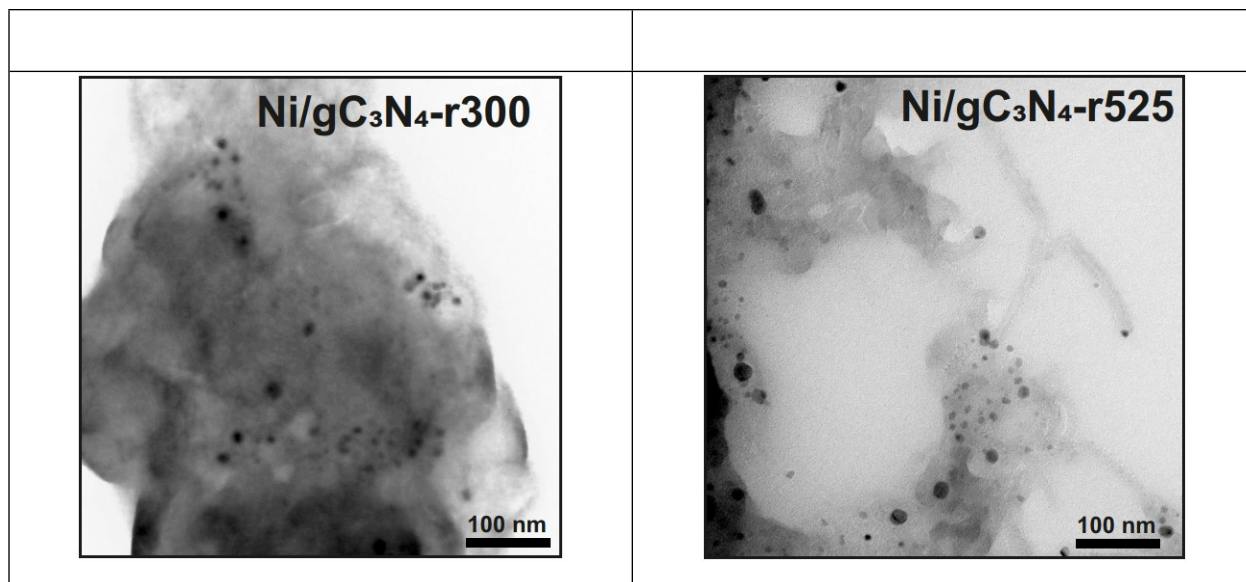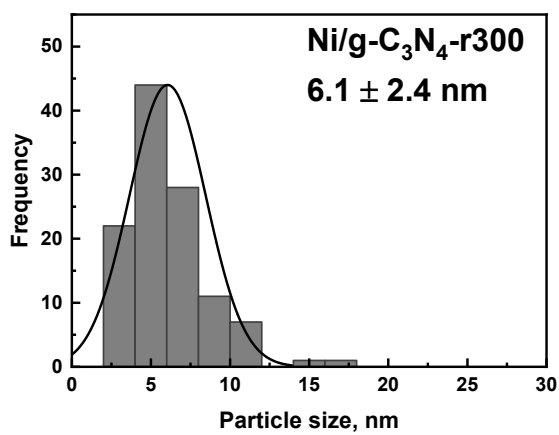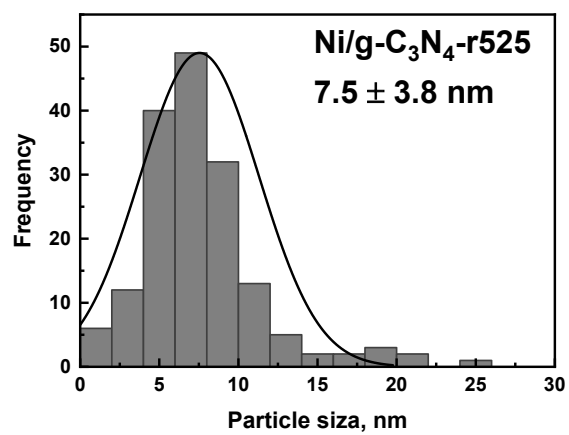

**Figure S5.** TEM images and particle size histograms of Ni/g-C<sub>3</sub>N<sub>4</sub>-r sample after reduction in hydrogen at 300 and 525 °C.

### **Identification of gases emitted upon the etching of Ni/g-C<sub>3</sub>N<sub>4</sub>**

The gases released upon the reduction of Ni/g-C<sub>3</sub>N<sub>4</sub> sample were identified with the use of a mass spectrometer ThermoStar made by Pfeiffer, model GDS301T2, with electron ionization and a QMA200 M analyser. The reduction of the Ni/g-C<sub>3</sub>N<sub>4</sub> was performed in a ChemiSorb 2705 made by Micromeritics, in the flow of 10 vol.% H<sub>2</sub>/Ar (30mL h<sup>-1</sup>) at the temperature ramp of 10 °C min<sup>-1</sup>. The spectrum presented in Figure S1 was taken upon the reduction at 525 °C. The fragmentation ions were identified on the basis of the NIST basis (National Institute of Standards and Technology) [2] and [3] – Figure S6, Table S1.

CH<sub>4</sub> (12, 13, 14, 15, 16)  
NH<sub>3</sub> (14, 15, 16, 17, 18)  
HCN (12, 13, 14, 15, 26, 27, 28, 29)

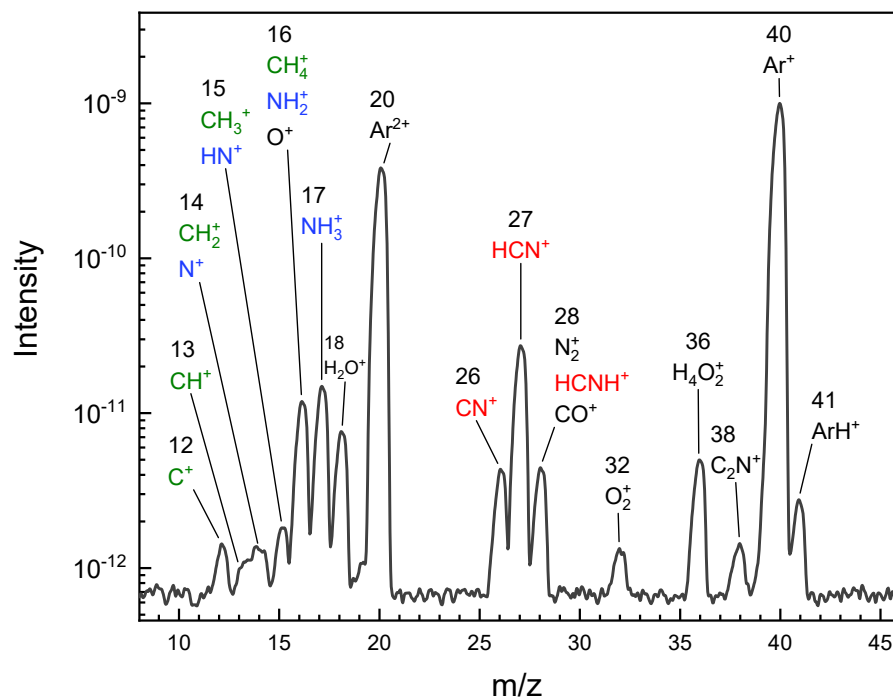

**Figure S6.** Mass spectrum recorded at 525 °C during temperature-programmed reduction of Ni/g-C<sub>3</sub>N<sub>4</sub>.



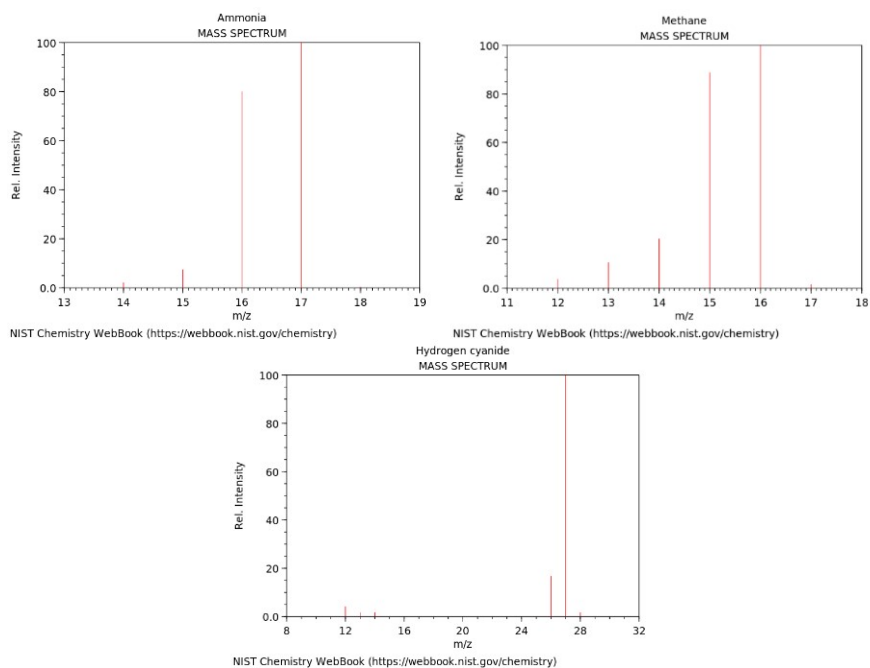

**Figure S7.** Reference mass spectra of ammonia, methane and hydrogen cyanide (according to [2]).

Table S1 presents the characteristic fragmentation ions of the gases observed in the mass spectra, and their relative intensities. In the gas products of the Ni/g-C<sub>3</sub>N<sub>4</sub> sample reduction, the following ions were identified, those of m/z= 12, 13, 14, 15, 16 assigned to the fragmentation of methane, [3] those of m/z=14, 15, 16, 17, 18 assigned to ammonia [4] and those of m/z= 12, 13, 14, 15, 26, 27, 28, 29 evidencing the presence of hydrogen cyanide. Moreover, the spectra showed the ions coming from hydrogen and argon (components of the reducing mixture), small amounts of water and traces of air from the surroundings.

**Table S1.** NIST neutral gas fragmentation patterns for gases. G.T. Paschmann, P.W. Daly, I. International Space Science, Analysis methods for multi-spacecraft data, (1998) ([http://www.issibern.ch/PDF-Files/analysis\\_methods\\_1\\_1a.pdf](http://www.issibern.ch/PDF-Files/analysis_methods_1_1a.pdf))

| m/z | CH <sub>4</sub> | NH <sub>3</sub> | H <sub>2</sub> O | HCN   | N <sub>2</sub> | O <sub>2</sub> |
|-----|-----------------|-----------------|------------------|-------|----------------|----------------|
| 12  | 0.038           |                 |                  | 0.042 |                |                |
| 13  | 0.106           |                 |                  | 0.017 |                |                |
| 14  | 0.204           | 0.022           |                  | 0.017 | 0.137          |                |
| 15  | 0.888           | 0.075           |                  | 0.001 |                |                |
| 16  | 1.000           | 0.801           | 0.009            |       |                | 0.218          |
| 17  | 0.016           | 1.000           | 0.212            |       |                |                |
| 18  |                 | 0.004           | 1.000            |       |                |                |
| 19  |                 |                 | 0.005            |       |                |                |
| 20  |                 |                 | 0.003            |       |                |                |
| 26  |                 |                 |                  | 0.168 |                |                |
| 27  |                 |                 |                  | 1.000 |                |                |
| 28  |                 |                 |                  | 0.017 | 1.000          |                |
| 29  |                 |                 |                  | 0.001 | 0.007          |                |
| 32  |                 |                 |                  |       |                | 1.000          |

**Table S2.** The results of the XPS analysis of g-C<sub>3</sub>N<sub>4</sub>, g-C<sub>3</sub>N<sub>4</sub>-r and Ni/g-C<sub>3</sub>N<sub>4</sub>-r after reduction at 525 °C.

|          |                       | g-C <sub>3</sub> N <sub>4</sub> |      |       | g-C <sub>3</sub> N <sub>4</sub> -r |      |       | Ni/g-C <sub>3</sub> N <sub>4</sub> |      |       |
|----------|-----------------------|---------------------------------|------|-------|------------------------------------|------|-------|------------------------------------|------|-------|
|          |                       | B.E., eV                        | FWHM | % at. | B.E., eV                           | FWHM | % at. | B.E., eV                           | FWHM | % at. |
| Nitrogen | Quaternary            | 401.2                           | 1.0  | 4.2   | 401.2                              | 1.0  | 4.2   | 401.2                              | 1.7  | 1.0   |
|          | NH                    | 400.3                           | 1.0  | 5.0   | 400.3                              | 1.0  | 5.5   | 400.4                              | 1.7  | 0.4   |
|          | NH <sub>2</sub>       | 399.3                           | 1.0  | 6.5   | 399.4                              | 1.0  | 6.9   | 399.4                              | 1.7  | 0.8   |
|          | Py                    | 398.6                           | 1.0  | 27.9  | 398.6                              | 1.0  | 26.0  | 398.7                              | 1.7  | 2.5   |
|          | N(O <sub>x</sub> )    | -                               | -    | -     | -                                  | -    | -     | 404.1                              | 2.2  | 0.4   |
|          | Total nitrogen:       |                                 |      | 43.6  |                                    |      | 42.6  |                                    |      | 5.1   |
| Carbon   | O-C=N                 | -                               | -    | -     | -                                  | -    | -     | 289.2                              | 0.6  | 0.8   |
|          | Py                    | 288.0                           | 1.0  | 34.9  | 288.0                              | 0.9  | 35.1  | 288.1                              | 1.1  | 1.8   |
|          | Nitrile (C≡N)         | 287.0                           | 0.3  | 0.1   | 287.1                              | 1.1  | 1.1   | -                                  | -    | -     |
|          | AdC                   | 284.6                           | 1.1  | 17.3  | 284.6                              | 1.4  | 18.6  | 284.6                              | 1.1  | 21.6  |
|          | Graphitic             | -                               | -    | -     | -                                  | -    | -     | 284.4                              | 0.9  | 53.9  |
|          | Defective             | -                               | -    | -     | -                                  | -    | -     | 283.9                              | 1.4  | 10.8  |
|          | Total carbon*:        |                                 |      | 35.0  |                                    |      | 36.2  |                                    |      | 67.3  |
| Oxygen   | O <sub>2</sub> ads.   | 533.1                           | 1.4  | 2.1   | 533.7                              | 1.6  | 1.1   | 533.9                              | 1.4  | 1.5   |
|          | H <sub>2</sub> O ads. | 531.7                           | 1.2  | 1.9   | 532.2                              | 1.6  | 1.6   | 532.5                              | 1.4  | 1.9   |
|          | NiO                   | 530.2                           | 1.3  | 0.1   | -                                  | -    | -     | 529.7                              | 0.9  | 0.2   |
|          | O=C-N                 | -                               | -    | -     | -                                  | -    | -     | 531.5                              | 0.9  | 0.1   |
|          | NiO                   | -                               | -    | -     | -                                  | -    | -     | 531.3                              | 1.7  | 0.9   |
|          | Total oxygen:         |                                 |      | 4.1   |                                    |      | 2.7   |                                    |      | 4.6   |

\*without of AdC

## References

- (1) Lotsch, B.V.; Schnick, W. From triazines to heptazines: Novel nonmetal tricyanomelaminates as precursors for graphitic carbon nitride materials. *Chem. Mater.* **2006**, *18*, 1891–1900. DOI: 10.1021/cm052342f
- (2) NIST Chemistry WebBook, NIST Standard Reference Database Number 69. National Institute of Standards and Technology. August 25, 2021. <https://doi.org/10.18434/T4D303> (accessed).
- (3) Wei, B.; Zhang, Y.; Wang, X.; Lu, D.; Lu, G. C.; Zhang, B. H.; Tang, Y. J.; Hutton, R.; Zou, Y. Fragmentation mechanisms for methane induced by 55 eV, 75 eV, and 100 eV electron impact. *J. Chem. Phys.* **2014**, *140* (12), 8, Article. DOI: 10.1063/1.4868651.
- (4) Rejoub, R.; Lindsay, B. G.; Stebbings, R. F. Electron-impact ionization of NH<sub>3</sub> and ND<sub>3</sub>. *J. Chem. Phys.* **2001**, *115* (11), 5053-5058. DOI: 10.1063/1.1394748. Wuest, M.; Evans, D. S.; von Steiger, R. Fragmentation Patterns and Total Ionization Cross Sections. In *Calibration of Particle Instruments in Space Physics*, Wuest, M., Evans, D. S., von Steiger, R. Eds.; ESA Publications Division Keplerlaan 1, 2200 AG Noordwijk, The Netherlands, 2007; pp 555-570.
